1 **Next Generation-Targeted Amplicon Sequencing (NG-TAS): An optimised**  
2 **protocol and computational pipeline for cost-effective profiling of circulating**  
3 **tumour DNA.**

4

5 **Authors**

|                                   |                                    |
|-----------------------------------|------------------------------------|
| Meiling Gao <sup>1,6</sup>        | mg390@cam.ac.uk                    |
| Maurizio Callari <sup>1,6</sup>   | Maurizio.Callari@cruk.cam.ac.uk    |
| Emma Beddowes <sup>1,2</sup>      | Emma.Beddowes@cruk.cam.ac.uk       |
| Stephen-John Sammut <sup>1</sup>  | Stephen-John.Sammut@cruk.cam.ac.uk |
| Marta Grzelak <sup>1</sup>        | Marta.Grzelak@cruk.cam.ac.uk       |
| Heather Biggs <sup>2</sup>        | heather.biggs@addenbrookes.nhs.uk  |
| Linda Jones <sup>2</sup>          | linda.jones@addenbrookes.nhs.uk    |
| Abdelhamid Boumertit <sup>2</sup> | ab2421@medschl.cam.ac.uk           |
| Sabine C Linn <sup>3</sup>        | s.linn@nki.nl                      |
| Javier Cortes <sup>4,5</sup>      | jacortes@vhio.net                  |
| Richard Baird <sup>2</sup>        | rdb39@medschl.cam.ac.uk            |
| Suet-Feung Chin <sup>1*</sup>     | Suet-Feung.Chin@cruk.cam.ac.uk     |
| Carlos Caldas <sup>1,2*</sup>     | Carlos.Caldas@cruk.cam.ac.uk       |

6

7 **Institutional Addresses**

8 <sup>1</sup>Department of Oncology and Cancer Research UK Cambridge Institute, Li Ka Shing  
9 Centre, University of Cambridge, Cambridge CB2 0RE, UK

10 <sup>2</sup>Breast Cancer Programme, Cancer Research UK Cambridge Cancer Centre,  
11 Cambridge University Hospitals NHS Foundation Trust, Cambridge CB2 2QQ, UK

12 <sup>3</sup>Netherland Cancer Institute, 1006 BE, Amsterdam, Netherland

13 <sup>4</sup>Ramon y Cajal University Hospital, 28034 Madrid, Spain

14 <sup>5</sup>Vall d'Hebron Institute of Oncology, 08035 Barcelona, Spain

15 <sup>6</sup>Co-first author

16 \*Co-corresponding authors

17

18

1 **Abstract**

2 Circulating tumour DNA (ctDNA) detection and monitoring has enormous potential  
3 clinical utility in oncology. We describe here a fast, flexible and cost-effective method  
4 to profile multiple genes simultaneously in low input ctDNA: Next Generation-Targeted  
5 Amplicon Sequencing (NG-TAS). We designed a panel of 377 amplicons spanning 20  
6 cancer genes and tested the NG-TAS pipeline using cell-free DNA from two hapmap  
7 lymphoblastoid cell lines. NG-TAS robustly detected mutations in cell-free DNA  
8 (cfDNA) when mutation allele fraction was >1%. NG-TAS of plasma cfDNA is therefore  
9 adequate to monitor metastatic cancer, as we show in a pilot study.

10

11 **Keywords**

12 NG-TAS, ctDNA, liquid biopsy, mutation, multiplexing, deep sequencing,  
13 computational pipeline, cancer, heterogeneous

14

15

## 1 BACKGROUND

2 Cell free DNA (cfDNA) in plasma was first analysed in cancer patients nearly 50  
3 years ago [1]. A fraction of cfDNA was shown to carry mutations found in the matched  
4 tumour, and designated circulating tumour DNA (ctDNA) [1–3]. The utility of ctDNA as  
5 a non-invasive diagnostic, prognostic or predictive biomarker in human cancer is now  
6 well documented [4–8].

7 The amount of cfDNA in plasma is usually low and the ctDNA fraction is typically  
8 only 1-30%, hence low mutant allele frequencies have to be robustly detected. Human  
9 cancers are genetically heterogeneous and mutations occur infrequently at recurrent  
10 hotspots. Therefore, in most clinical scenarios (e.g. early diagnosis or monitoring of  
11 tumour evolution), high sensitivity and the simultaneous investigation of multiple gene  
12 targets are desirable features of any ctDNA detection and quantitation method.

13 There are a range of methods for detecting mutations in ctDNA, with the target  
14 varying from a single nucleotide variant (SNV) to the whole genome. A widely used  
15 method to detect mutations in ctDNA is digital polymerase chain reaction (dPCR)  
16 performed in microfluidic devices or water-in-oil droplet emulsions [9,10]. Whilst dPCR  
17 is able to detect rare mutations with extremely high sensitivity, it is restricted by the  
18 number of targets that can be examined in a single reaction [11].

19 Several sequencing based approaches have been developed to incorporate  
20 multiple genomic loci, enabling *de novo* mutation identification in ctDNA. Previously,  
21 we described Targeted Amplicon Sequencing (TAm-Seq), which utilised 48 primer  
22 pairs to identify mutations in hotspots or selected regions of 6 key driver genes [12].  
23 While TAm-Seq is useful, it is limited to a small number of targets. Capture based  
24 sequencing methods can cover a larger number of genes (or the whole exome), but  
25 are costly at the sequencing coverage (>300) required to detect allele frequencies  
26 ~1%.

27 There several ready to use commercial kits for ctDNA sequencing, which can cover  
28 up to hundreds of mutation hotspots and many genes. These include Invision™  
29 (Inivata), Oncomine™ cfDNA assay (Thermo Fisher Scientific), Guardant360™  
30 (Guardant Health), and PlasmaSELECT™ (Personal Genome Diagnostics). These  
31 products are expensive and test custom gene panels. Disturbingly, a recent study  
32 comparing the performance of two of these commercial products (Guardant360™ and  
33 PlasmaSELECT™) in a cohort of plasma samples from prostate cancer patients,  
34 revealed poor agreement [13].

35 Recently unique molecular barcodes have been developed to tag each cfDNA  
36 template molecule before PCR amplification in order to reduce the error rate and allow  
37 robust detection of rare mutant alleles in ctDNA [14].

1        In summary, using current ctDNA profiling methodology, the detection of mutations  
2 in a good number of cancer genes with sufficient sensitivity and in a cost-effective way  
3 poses significant challenges. Here we describe a new method for the profiling of  
4 ctDNA, designated Next Generation-Targeted Amplicon Sequencing (NG-TAS), with  
5 several unique features: i) optimised for low input ctDNA; ii) high level of multiplexing,  
6 enabling the analyses of multiple gene targets; iii) a bespoke computational pipeline  
7 for data analysis; and iv) very competitive costing. NG-TAS is designed to be flexible  
8 in terms of choice of gene targets and regions of interest; thus, it can be tailored to  
9 various cancer types and clinical contexts.

10

11

## 1 **RESULTS**

### 2 **Optimising targeted deep sequencing in cfDNA by NG-TAS**

3 We designed 377 pairs of primers covering all exons or hotspots of 20 genes  
4 commonly mutated in breast cancer (Table 1). Since the average cfDNA fragment size  
5 is 160-170bp, NG-TAS primers were designed to generate amplicons of 69-157bp  
6 (Table S1).

7 In a preliminary optimization step, individual primer pairs were tested in conventional  
8 single and multiplexed (7-8plex) PCR reactions. The NG-TAS experimental workflow  
9 (Figure 1A), starts with a multiplexed PCR step (7-8 primer pairs) performed using  
10 Access Array™, a microfluidic system from Fluidigm. Each multiplexed reaction  
11 contained primers targeting different genes to minimise the generation of unwanted  
12 PCR products. The multiplexed PCR products were assessed using the Bioanalyser  
13 and 2200 TapeStation instrument (Agilent Genomics; Figure S1). Multiplexed PCR  
14 products were then pooled and barcoded with 384 unique barcodes in a second PCR  
15 reaction. Barcoded products were pooled, and size selected to remove primer dimers  
16 before submission for NGS paired-end 150bp sequencing.

17 Raw sequencing data were aligned and processed as described in Figure 1B and  
18 Methods. Specific filters were applied to exclude reads from primer dimers or other  
19 PCR artefacts. Since the amplicons are partially overlapping, each read was assigned  
20 to its respective amplicon, to enable a per-amplicon analysis for coverage estimation  
21 and mutation calling.

22 To optimise NG-TAS we used cfDNA isolated from the culture media of the Platinum  
23 Genome Hapmap NA12878 cell line. The size profile of cfDNA isolated from the tissue  
24 culture media was similar to that of plasma cfDNA (Figure S2). We tested a range of  
25 input cfDNA amounts with NG-TAS (0.016 ng to 50 ng) in 4 replicates for each input.  
26 For each cfDNA input we tested: i) a pre-amplification step and ii) the use of the Qiagen  
27 Q solution. To assess the data generated the percentage of aligned sequencing reads  
28 was computed (Figure 2A). In the TAM-Seq protocol addition of a pre-amplification  
29 step reduced the probability of nonspecific amplification and biased coverage [12].  
30 However, using NG-TAS the pre-amplification step reduced the percentage of aligned  
31 reads in all cfDNA input samples tested. Hence, we eliminated pre-amplification from  
32 the NG-TAS protocol. Adding Q solution systematically increased the percentage of  
33 aligned reads, with the largest improvement observed with 0.4 and 2 ng input samples  
34 (Figure 2A). Thus, we incorporated the Q solution in all subsequent NG-TAS  
35 experiments.

36 We then used the optimised NG-TAS protocol in triplicate experiments for each input  
37 NA12878 cfDNA (2 ng, 5 ng, and 10 ng). With 10ng of input cfDNA NG-TAS generated

1 a median read depth of 3064x, and only 22/377 amplicons (5.8%) had coverage less  
2 than 100x (Figure 2B). In fact, high amplicon coverage was observed irrespective of  
3 amount of input cfDNA (Figure S3A and S3B). The coverage heatmap of individual  
4 amplicons showed similar patterns with 10 ng and 5 ng cfDNA input. Strong  
5 consistency was observed within each triplicate (Figure 2C). However, with 2ng cfDNA  
6 input we observed stochastic reduction in coverage for some of the amplicons. This is  
7 probably due to a reduction in template availability, with the number of amplifiable  
8 copies approaching zero for some of the amplicons.

9 Using these data, the background noise was estimated by computing the average  
10 frequency for non-reference bases in each position, and for 99% of the targeted  
11 genomic positions background noise was  $\leq 0.3\%$  (Figure 2D).

12

### 13 **Sensitivity and specificity of mutation detection in control cfDNA**

14 To establish an analysis pipeline and assess the performance of NG-TAS, we  
15 generated a benchmark dilution series, similar to what we have previously described  
16 [15], using cfDNA collected from the tissue culture media from two lymphoblastoid cell  
17 lines from the HapMap/1000 Genome Project, NA12878 (the Platinum Genome  
18 sample) and NA11840, to mimic a tumour-normal (or plasma-normal) pair. The dilution  
19 series mixed cfDNA from NA12878 with an increasing amount of cfDNA from NA11840  
20 (from 0 to 99.8% by volume, n=12, Table S2). This cfDNA dilution series was used to  
21 investigate the sensitivity in detecting mutations at high and low allele frequency (50%  
22 - 0.1%). The 377-amplicon panel encompassed four heterozygous single nucleotide  
23 polymorphisms (SNPs) present only in NA12878. These SNPs were used as “somatic”  
24 mutations for the purpose of this analysis.

25 Using NG-TAS the cfDNA dilution series was tested in triplicate, varying the input  
26 cfDNA from 5 ng to 50 ng. Since in clinical plasma samples the amount of ctDNA is  
27 frequently a limiting factor, we also tested the ThruPlex plasma-seq kit (requiring as  
28 little as 3 ng of cfDNA input) to generate a whole genome cfDNA library (termed NGS  
29 cfDNA library). An aliquot of this NGS cfDNA library was then used as input for NG-  
30 TAS.

31 These NG-TAS experiments showed a strong linear relationship between the  
32 observed and expected variant allele frequencies (VAF) for the four “somatic”  
33 mutations (Table 2, Figure 3). As the input cfDNA reduced from 50 ng to 5 ng the R  
34 squared values decreased from 0.968 to 0.885. With 10 ng input cfDNA, VAFs as low  
35 as 1% could be robustly detected. Lowering the input cfDNA generated more variable  
36 results, in particular at low AF. This is probably caused by stochastic amplification of

1 the alternative allele. NG-TAS performed using NGS cfDNA library as input performed  
2 better than 5 ng of cfDNA input ( $R^2=0.964$ , Table 2, Figure 3).

3 The NG-TAS analysis pipeline was developed and optimised using this dilution  
4 series data and later applied to data from clinical plasma samples. As illustrated in  
5 Figure 4A and in the Methods section, mutation calling was performed using MuTect2,  
6 processing each amplicon individually. To limit the number of false positives (FPs)  
7 caused by PCR errors, we only called mutations observed in at least two out of three  
8 replicates. With the reported settings and using 10 ng of input cfDNA from the dilution  
9 series, all four SNVs were called when the expected VAF was 5% or higher, and 3 of  
10 4 SNVs when the expected VAF was 1% (Figure 4B). No FPs with VAF higher than  
11 3% were called with 50 ng and 10 ng input cfDNA from the dilution series. NG-TAS of  
12 both the 5 ng cfDNA input and NGS cfDNA library input generated seven FPs above  
13 3% in the dilution series (Figure 4C). Template scarcity and extra PCR cycles during  
14 library preparation could explain this increase in FPs.

15 Therefore, for NG-TAS in plasma samples we recommend the use of 10 ng cfDNA  
16 per replicate as input, and a threshold of 5% VAF for *de novo* mutation calling. In  
17 plasma samples with less cfDNA the use of NGS cfDNA library as input for NG-TAS  
18 enables ctDNA profiling in samples with as little as 3 ng of cfDNA. However, this  
19 approach is more suitable for tracking in plasma ctDNA mutations previously identified  
20 in the tumour, rather than for *de novo* plasma ctDNA mutation calling.

21

## 22 **Testing NG-TAS performance in cancer patient samples**

23 We applied NGTAS to a clinical cohort of 30 metastatic breast cancer patients from  
24 which we have collected 360 plasma samples (for 31 of these NGS cfDNA library  
25 samples were used) and buffy coats. This cohort is part of a clinical trial which will be  
26 comprehensively reported in a separate manuscript (Baird et al, in preparation).

27 To estimate the FP rate in blood samples, we used pairs of DNA extracted from the  
28 buffy coats collected at two different time points from four patients. Any mutation  
29 identified by NG-TAS in any of the eight possible buffy coat DNA pairs tested was  
30 considered a FP. Figure 5A shows that in these samples NG-TAS identified no FP with  
31 VAF greater than 5% (a result similar to NG-TAS performed using the cell line cfDNA  
32 dilution series, Figure 4C).

33 In 24 of the cases in our cohort, at least one tissue sample was also available and  
34 analysed. Sixteen of these cases had tissues from the primary tumour while in the  
35 remaining 8 cases, tissue samples were obtained from metastasis biopsies collected  
36 during the trial. Overall, we found at least one mutation in 21/24 patients (87.5%, Figure  
37 5B). Forty-four mutations were detected in the tissue samples and 60 in at least one

1 plasma sample; of these, 23 were observed in both tissue and plasma. The agreement  
2 was higher for the 8 cases where a metastasis biopsy was sequenced (7 mutations  
3 detected in the tissue, 11 detected in plasma, 7 in common) than in the 16 cases where  
4 a primary tumour was tested (33 mutations detected in the tissue, 41 in plasma, 19 in  
5 common, Supplementary Figure 5). The discordance in this case is probably due to  
6 the time gap between the primary tumour tissue sample and plasma, the latter obtained  
7 when the patients had metastatic disease. In addition, most of the tissue samples were  
8 formalin-fixed paraffin-embedded (FFPE) hence, we detected an increase of C>T/G>A  
9 SNVs not usually found in ctDNA samples (Supplementary Figure 5).

10 We used dPCR to validate a subset of the mutations identified in seven patients in  
11 which NG-TAS was performed either directly on cfDNA (n=4) or using post-NGS library  
12 products (n=3). In the four direct NG-TAS samples, four hotspot mutations *PIK3CA*  
13 (*H1047R* and *E545K*), *KRAS* (*G13D*), *ESR1* (*D538G*) and *AKT1* (*E17K*) were all  
14 validated by dPCR. A good concordance between VAFs estimated by NG-TAS and  
15 dPCR was found ( $R^2=0.64$ , Figure 5C). In the three patients where post-NGS library  
16 products was used as input, two *PIK3CA* hotspots (*H1047R* and *E545K*) were also  
17 validated by dPCR and a high concordance between the VAFs estimated by NG-TAS  
18 and dPCR was observed ( $R^2=0.80$ , Figure 5D).

19

## 20 **Monitoring response in breast cancer patients using NG-TAS**

21 We report the example of two patients from the above clinical trial to demonstrate  
22 the use of NG-TAS for metastatic breast cancer disease monitoring. Patients had  
23 clinical monitoring performed as per the trial protocol using RECIST (Response  
24 Evaluation Criteria in Solid Tumour), version 1.1.

25 The first patient had RECIST partial response in the first 28 weeks, and progression  
26 on day 197. NG-TAS identified mutations in *GATA3* (*F431fs*), *PIK3CA* (*E542K*),  
27 *CDKN1B* (*N124fs*) and *PTEN* (*137-139del*) (Figure 6A). *PTEN* mutation VAFs in  
28 ctDNA showed parallel dynamics to RECIST: initial drop, followed by continuous rise  
29 from day 85, preceding RECIST progression by over 100 days. The VAFs of the other  
30 mutations showed a parallel rise starting later.

31 The second patient had stable disease by RECIST during the 60 days of available  
32 follow up. Due to limited amount of cfDNA extracted in this case, NG-TAS was  
33 performed using NGS cfDNA libraries. NG-TAS detected *PIK3CA* (*H1047R*), *MAP3K1*  
34 (*E303fs*) and *TP53* (*R141H* and *P46fs*) mutations, and their VAFs showed stable  
35 values, then a slight reduction between days 20-56, followed by a slightly rise by the  
36 time monitoring was discontinued (Figure 6B).



1        These two examples demonstrate the use of NG-TAS in plasma cfDNA samples to  
2        monitor tumour burden in metastatic breast cancer patients.  
3  
4

## 1 **DISCUSSION**

2 The genes frequently mutated in different human cancers have been characterized  
3 by large-scale sequencing studies such as The Cancer Genome Atlas [16,17]. These  
4 pan-cancer studies have revealed that most human tumours have at least 1-10 driver  
5 mutations, allowing the design of custom gene panels that could be used for generic  
6 cancer detection. But the challenge remaining is there are very few recurrent or hotspot  
7 mutations in tumours such as breast cancer, with mutations spread along the protein  
8 coding region, as observed in *TP53*, *GATA3* and *MAP3K1*. Therefore, it would be  
9 desirable to cover most exons of these genes simultaneously in a ctDNA mutation  
10 detection panel.

11 The detection of specific mutations in ctDNA is achievable by dPCR, now considered  
12 the gold standard to detect mutations with low VAFs. However, dPCR is constrained  
13 by the number of mutations that can be detected in a single reaction [11]. Thus, its  
14 high sensitivity and specificity is at the expense of the number of mutations that can  
15 be detected concurrently. At the other end of the spectrum, whole genome sequencing  
16 or whole exome sequencing suffer from reduced sensitivity at the current achievable  
17 level of sequencing depth [18].

18 We report here a new approach, NG-TAS, an optimised targeted amplicon  
19 sequencing pipeline that provides clinically relevant sensitivity in mutation calling  
20 across a targeted, but relatively broad and customizable panel of genes. The current  
21 version of NG-TAS covers all exons or hotspots of 20 breast cancer-associated genes  
22 in a total of 377 amplicons, has a lower detection limit of 1% VAF, and requires only  
23 three aliquots of 10 ng cfDNA input. The single step multiplexed PCR amplification  
24 makes it a less time consuming method and more cost effective than other assays,  
25 such as the commercially available OncoPrint assay (Table 3). NG-TAS is flexible and  
26 custom designed primers can be adjusted to the needs of the end user, depending on  
27 the cancer type and the clinical context.

28 Importantly, we developed a bespoke NG-TAS computational pipeline for data  
29 analysis, with all the relevant open-source code available at GitHub  
30 ([https://github.com/cclab-brca/NGTAS\\_pipeline](https://github.com/cclab-brca/NGTAS_pipeline)), together with the benchmark dataset  
31 generated using control cfDNA obtained from the Platinum Genome cell line NA12878.  
32 These will be instrumental to test and further develop the computational pipeline, as  
33 required by regulatory agencies (<https://precision.fda.gov/>).

34 The custom design of primers for NG-TAS is potentially challenging. Building a  
35 customised panel of primers manually, using the tool mentioned above is time-  
36 consuming and, in some cases difficult due to genomic sequence context (e.g. high  
37 GC and repetitive regions). The multiplex PCR requires a fixed annealing temperature,

1 but more complex PCR cycle design can circumvent this. Nevertheless, we were able  
2 to design primers that yielded in 94% of amplicons over 100x coverage (Figure 2B).  
3 We provide all primer sequences (Table S1) and an open source optimised primer  
4 library will be growing with an NG-TAS user community.

5 When using NG-TAS for accurate estimation of VAF, as required to do serial tumour  
6 burden monitoring, our data suggests that at least 10 ng of input cfDNA per replicate  
7 is required. NG-TAS does not perform robustly with cfDNA input below 5 ng (per  
8 replicate), with amplicon coverage reduced in a stochastic manner, probably due to  
9 the limited availability of template. A suitable alternative protocol for these cases is to  
10 generate an NGS cfDNA library, requiring only 3 ng of cfDNA, and use the library  
11 material as input for NG-TAS.

12 A future development of NG-TAS will be the use of molecular barcoding, since this  
13 has been shown to improve sensitivity and specificity of amplicon-based deep  
14 sequencing [19]. This will have cost implications that would limit one of the main  
15 advantages of the current NG-TAS protocol.

16

## 17 **Conclusions**

18 We have described here the workflow for a highly multiplexed cfDNA deep  
19 sequencing method named NG-TAS. NG-TAS assesses the mutational status of  
20 several genes simultaneously, with high sensitivity (allowing quantification of AF) and  
21 competitive costs, and offers flexibility in the choice of target genes. We have also  
22 shown proof of principle that the monitoring of ctDNA using NG-TAS in metastatic  
23 breast cancer can allow detection of cancer progression earlier than conventional  
24 RECIST measurements.

25

## 1 **METHODS**

### 2 **Patient samples and blood processing**

3 Patients were recruited from 3 different centres including Cambridge University  
4 Hospital, Netherland Cancer Institute (NKI) and Vall d'Hebron Institute of Oncology  
5 (VHIO). Metastatic breast cancer patients with hormone receptor positive tumours  
6 were recruited as a part of a clinical trial (patient number = 30, plasma samples number  
7 = 366). Blood samples were collected in EDTA tubes and processed within one hour  
8 to prevent lymphocyte lysis and fragmentation. Samples were centrifuged at 820g for  
9 10min at room temperature to separate the plasma from the peripheral blood cells.  
10 The plasma was further centrifuged at 1400g for 10min to remove remaining cells and  
11 cell debris. The plasma was stored at -80°C until DNA extraction. This study was  
12 approved by the regulatory and ethic committees at each site and the reference  
13 number is NCT02285179 (<https://clinicaltrials.gov/ct2/show/NCT02285179>).

14

### 15 **DNA extraction from plasma and buffy coat**

16 Plasma DNA was extracted from between 2-4 ml of plasma with the QiaSymphony  
17 according to the manufacturer's instruction using Qiagen circulating DNA extraction  
18 kit. DNA was isolated from the buffy coat samples using DNeasy Blood & Tissue Kits  
19 (Qiagen).

20

### 21 **Generation of cfDNA from NA12878 and NA11840**

22 As previously reported [15] two lymphoblastoid cell lines, NA12878 and NA11840 from  
23 Human Genome Diversity Project (HGDP)-CEPH collection were obtained from the  
24 Coriell Cell Repository. The cell lines were grown as suspension in RPMI 1640-  
25 Glutamax (Invitrogen) supplemented with 10% foetal calf serum, 5% penicillin and  
26 streptomycin at 37°C and 5% CO<sub>2</sub>. The media that the cell lines were grown in were  
27 collected when cells were passaged. The media were centrifuged at 1500rpm for 10  
28 minutes at 4°C to remove cells and cellular debris. The clarified media were stored at  
29 -20°C until required. Cell-free DNA was extracted from the thawed media using the  
30 Qiagen circulating DNA extraction kit (Qiagen) according to the manufacturer's  
31 instructions and quantified using Qubit High Sensitivity DNA quantification kit (Life  
32 Technologies). DNA from both cell lines was diluted to obtain 50 ng/μl stock  
33 concentrations. To generate the serial dilutions of one cell line with the other, we mixed  
34 by volume to obtain the percentage (volume/volume) as presented in Table S2 (n=12).  
35 Platinum variant calls for sample NA12878 (the virtual 'tumour') and confident regions  
36 (high confidence homozygous reference regions plus platinum calls) [20] were  
37 downloaded from <http://www.illumina.com/platinumgenomes/>. Genotype data for

1 sample NA11840 (the virtual 'normal') was obtained from the 1000 Genomes website.  
2 Platinum calls were intersected with our NG-TAS panel target regions and variants  
3 shared with the NA11840 sample were excluded. Five platinum calls were covered  
4 theoretically by our NG-TAS panel; however, one was targeted by one of the amplicons  
5 showing no coverage, therefore 4 SNVs were considered as identifiable 'somatic  
6 variants'.

7

## 8 **NGS library construction**

9 NGS libraries were prepared from 3-5 ng of cfDNA using the ThruPLEX® Plasma-seq  
10 kit (Rubicon Genomics, USA) as described in the manufacturer's instructions. NGS  
11 library was quantified using qPCR KAPA Library Quantification kit (KAPA Biosystem),  
12 while the fragment size and the NGS library yield were measured with 2200  
13 TapeStation instrument (Agilent).

14

## 15 **Digital PCR**

16 BioMark system from Fluidigm has been used for dPCR, and the analyses have been  
17 performed as previously described [21]. As described in manufacturer's instructions,  
18 DNA samples were mixed with 2X TaqMan® Gene Expression Master Mix (Life  
19 Technology, 4369016), 20X GE Sample Loading Reagent (Fluidigm, 85000746) and  
20 20X gene-specific assays. The reaction mix were loaded on the qdPCR 37K™ IFC  
21 (Fluidigm, 100-6152). For *KRAS* (G13D) and *AKT1* (E17K) mutant and wild type  
22 PrimePCR™ ddPCR™ Mutation Assays were obtained from Bio-Rad  
23 (dHsaCP2000013 and dHsaCP2000014, dHsaCP2000032 and dHsaCP2000031  
24 respectively). The *PIK3CA* and *ESR1* probes and primers were previously described  
25 [7,22], and the primer and probes used are listed in Table S3.

26

## 27 **NG-TAS protocol**

### 28 Primer design for NG-TAS

29 Primers were designed with NCBI Primer-BLAST tool with T<sub>m</sub> range of 59-61°C. The  
30 universal primer sequences (CS1 and CS2) were added at the 5' end of the designed  
31 primers. All primer pairs were tested alone and in multiplexed PCR reactions using 10  
32 ng of TaqMan® Control Human Genomic DNA (Thermo Fisher Scientific) in 10 µl  
33 reaction volumes. The coverage and performance of primers were analysed using  
34 2200 TapeStation instrument (Agilent) and Hi-seq 4000. The primers were grouped  
35 together as 7-8plex, and primers in each group were chosen to target different genes  
36 in order to minimise non-specific amplification and cross-reactivity.

37

## 1 Access Array™ microfluidic system

2 The 377 pairs of optimised primers were divided into 48 wells, with each well containing  
3 7-8 pairs of primers for multiplexed PCR. Primers were diluted to the final concentration  
4 of 1 µM to make 20X primer solution. 4µl of the 20X primer solution from the 48 wells  
5 were added to the primer inlets of the Access Array™ IFC (Fluidigm). For the sample  
6 inlets, pre-sample master mix consisted of 2X Master Mix (Qiagen, 206143), 5X Q-  
7 solution, 20X Access Array™ Loading Reagent (Fluidigm), and DNA sample were  
8 added. The loaded IFC then moved to FC1™ Cyclor (Fluidigm) for thermal cycles:  
9 95°C for 15min, 30 cycles of 94°C for 30sec, 59°C for 90sec, 72°C for 90sec, and final  
10 extension step 60°C for 30min. The reaction products were harvested using Post-PCR  
11 IFC controller as described in manufacturer's instructions.

12 The harvested product was diluted (1:10) with water for further barcoding PCR.  
13 Barcoding PCR reaction master mix contains 2X Master Mix (Qiagen), diluted  
14 harvested product from Access Array™, and Access Array™ Barcode Library for  
15 Illumina® Sequencers single direction for barcoding primers (Fluidigm, 100-4876). The  
16 thermal cycle for barcoding is: 95°C for 10min, 15 cycles of 95°C for 15sec, 60°C for  
17 30sec, 72°C for 1min, and final extension step of 72°C for 3min. The PCR reaction  
18 was performed using T100™ Thermal Cyclor (Bio-Rad).

19

## 20 Quantification and clean-up of barcode Access Array™ harvest

21 After barcoding PCR, all samples were analysed using 2200 TapeStation (Agilent) to  
22 measure the concentration and size of the products (average 260bp). The PCR  
23 products were pooled and cleaned with AMPure XP beads (Beckman Coulter, A63880)  
24 following the manufacturer's instruction. Briefly, the samples were mixed with the  
25 magnetic beads to the ratio of 180:100 in volume. The beads were washed twice with  
26 80% ethanol and dried by incubating at 30°C for 10min. Then the beads were eluted  
27 with water and the cleaned PCR product was run on the E-Gel® 2% agarose gel  
28 (Thermo Fisher Scientific, G501802) for further size selection and extraction. The band  
29 between 200-300bp was cut out and DNA was isolated from the gel using the QIAquick  
30 Gel Extraction kit (Qiagen, 28704), and 10-20nM of the eluents was submitted for  
31 paired-end Hi-seq 4000 for sequencing.

32

## 33 **Analysis of NG-TAS data**

### 34 Quality control, alignment and bam files annotation

35 For each sequencing lane, quality control of raw data was performed using FastQC  
36 (<http://www.bioinformatics.babraham.ac.uk/projects/fastqc/>). Up to 384 samples were

1 multiplexed in a single sequencing lane and demultiplexing was performed using in-  
2 house software.

3 Alignment, read trimming (at 80bp) and base quality recalibration was performed in a  
4 single step using Novoalign (v 3.02). Alignment and bam metrics were computed using  
5 Picard Tools (v 1.140). To remove potential off-target PCR products, only reads  
6 mapped in proper pair and with insert size > 60bp were retained. After this filtering,  
7 bam files were locally realigned using the Genome Analysis Toolkit (GATK, v 3.5).  
8 Reads were then assigned to the amplicon they belonged to using a custom java script,  
9 in order to enable a per amplicon coverage and mutation calling analysis. Coverage  
10 was computed for each amplicon in each sample using a custom java/R script. One  
11 amplicon (SF3B1\_D0069\_001) showed an extremely high rate of mismatches and  
12 indels in all the analysed samples, therefore we excluded it from downstream analyses.

13

#### 14 Mutation calling

15 Mutation calling was run separately for each amplicon in the panel. The core mutation  
16 calling was performed for each pair of plasma and normal samples (or NA12878 an  
17 NA11849 from the dilution series) using Mutect2 (included in GATK 3.5). The  
18 *minPruning* parameter was set at 5 to reduce computational time with no significant  
19 impact on the results. Besides the set of mutations passing all internal filters, we  
20 included those failing the following internal filters or a combination of them:  
21 "alt\_allele\_in\_normal", "clustered\_events", "homologous\_mapping\_event",  
22 "multi\_event\_alt\_allele\_in\_normal". On this set of candidate mutations, we applied the  
23 following filtering criteria: coverage in normal and plasma >100x, alternative allele in  
24 normal <1% and plasma/normal VAF ratio >5. The core mutation calling was repeated  
25 for the three replicates generated for each pair and only mutations called in at least  
26 two replicates were retained. For this set of mutations, we run HaplotypeCaller  
27 (included in GATK 3.5) to compute the average VAF across the three replicates and  
28 filter out mutations with an average VAF<1% and an average plasma/normal ratio <5  
29 (Figure 4A). An extra filter was introduced for FFPE samples, where C>T and G>A  
30 transitions with VAF<15% were filtered out because likely to be consequence of  
31 cytosine deamination caused by fixation.

32 In calling somatic mutations from set of longitudinal samples from the same patient,  
33 we first repeated the above procedure for all samples. Then, HaplotypeCaller was run  
34 again to estimate in all samples the coverage and VAF of each mutation called in at  
35 least one of them. This was followed by a variant annotation step using Annovar.  
36 Finally, results obtained for all amplicons were merged to generate a single vcf file. A

- 1 final filter was applied at group level, that is, keeping only mutations that at least in one
- 2 sample had VAF higher than 5% (Figure S4).



## 1 **List of abbreviations**

---

|                                              |         |
|----------------------------------------------|---------|
| Next Generation Targeted Amplicon Sequencing | NG-TAS  |
| Cell Free DNA                                | cfDNA   |
| Circulating Tumour DNA                       | ctDNA   |
| Digital PCR                                  | dPCR    |
| Targeted Amplicon Sequencing                 | TAm-Seq |
| Next Generation Sequencing                   | NGS     |
| Formalin Fixed Paraffin Embedded             | FFPE    |
| Variant Allele frequency                     | VAF     |
| Single Nucleotide Variant                    | SNV     |
| False Positive                               | FP      |
| Uracil DNA Glycosylase                       | UDG     |
| Response Evaluation Criteria in Solid Tumour | RECIST  |
| Computed Tomography                          | CT      |

---

2

## 3 **Declarations**

### 4 **Ethics approval and consent to participate**

5 This study was approved by the East of England - Cambridge East Research Ethics  
6 Committee (REC reference: 14/EE/1045).

7

### 8 **Consent for publication**

9 Not applicable

10

### 11 **Availability of data and material**

12 The computational pipeline is available through GitHub ([https://github.com/cclab-](https://github.com/cclab-brca/NGTAS_pipeline)  
13 [brca/NGTAS\\_pipeline](https://github.com/cclab-brca/NGTAS_pipeline)) and NA12878 dilution series data are available through the  
14 precisionFDA portal (<https://precision.fda.gov/>).

15

### 16 **Competing interests**

17 All authors have no competing interests.

18

### 19 **Funding**

20 This research was supported with funding from Cancer Research UK. MG has been  
21 supported by a Genentech research grant (CLL-010907) awarded to the Caldas  
22 Laboratory. MC has received funding from the European Union's Horizon 2020

1 research and innovation program under the Marie Skłodowska-Curie grant  
2 agreement no. 660060.

3

#### 4 **Authors' contributions**

5 MG, MC, EB, SFC and CC conceived the study; MG and EB designed primers and  
6 generated the dilution series; MG performed NG-TAS in Fluidigm Access Array™  
7 system; RB, KB, SCL, JR, and JC conducted the clinical trial; HB, LJ and AB  
8 collected the clinical samples; MC developed the computational approach and  
9 performed the analyses; SJS contributed in the computational pipeline development;  
10 MC and MG performed data analysis; MG, MC, SFC and CC drafted the manuscript,  
11 all authors revised and approved the final manuscript.

12

#### 13 **Acknowledgements**

14 We are grateful to Cancer Research UK and the University of Cambridge for the  
15 support. We thank the Cancer Molecular Diagnostics Lab and Cancer Research UK  
16 Cambridge Institute Core Facilities including Genomics and Bio-repository that  
17 supported this work. We thank Dr PA Edwards for the scientific advice and editing for  
18 this manuscript.

19

20

1 **Table 1. List of genes and regions covered in the panel**

2

| <b>Gene</b>   | <b>Target region</b> | <b>Hotspot position</b>                           |
|---------------|----------------------|---------------------------------------------------|
| <i>AKT1</i>   | Hotspot              | E17<br>AA23 – 59<br>AA65 - 94                     |
| <i>BRAF</i>   | Hotspot              | V600                                              |
| <i>Her2</i>   | Hotspot              | S310<br>AA428 - 438<br>AA746 – 797<br>AA832 – 986 |
| <i>HRAS</i>   | Hotspot              | AA3 – 35 (G12 and G13)<br>AA49 – 77 (Q61 and A66) |
| <i>IDH2</i>   | Hotspot              | AA132 - 162                                       |
| <i>KRAS</i>   | Hotspot              | G12                                               |
| <i>SF3B1</i>  | Hotspot              | K700                                              |
| <i>ESR1</i>   | Part of exons        | Exon 8 - 10 (LBD)                                 |
| <i>SMAD4</i>  | Part of exons        | Exon 8 – 12                                       |
| <i>CDH1</i>   | All exons            |                                                   |
| <i>CDKN1B</i> | All exons            |                                                   |
| <i>FOXA1</i>  | All exons            |                                                   |
| <i>GATA3</i>  | All exons            |                                                   |
| <i>MAP2K4</i> | All exons            |                                                   |
| <i>MAP3K1</i> | All exons            |                                                   |
| <i>PIK3CA</i> | All exons            |                                                   |
| <i>PIK3R1</i> | All exons            |                                                   |
| <i>PTEN</i>   | All exons            |                                                   |
| <i>RUNX1</i>  | All exons            |                                                   |
| <i>TP53</i>   | All exons            |                                                   |

3

4

1 **Table 2. Linear regression analysis for different cfDNA input**

2

| <b>Input DNA</b> | <b>R<sup>2</sup></b> | <b>Estimated coefficient</b> | <b>2.5% CI</b> | <b>97.5% CI</b> |
|------------------|----------------------|------------------------------|----------------|-----------------|
| <b>50ng</b>      | 0.968                | 1.075                        | 1.018          | 1.133           |
| <b>10ng</b>      | 0.940                | 1.005                        | 0.930          | 1.080           |
| <b>5ng</b>       | 0.885                | 0.932                        | 0.832          | 1.032           |
| <b>Library</b>   | 0.964                | 1.123                        | 1.059          | 1.187           |

3

4

1 **Table 3: Comparison of different amplicon based sequencing**  
 2 **approaches for cfDNA**  
 3

|                                           | <b>NG-TAS</b>            | <b>Digital PCR</b> | <b>TAm-Seq</b>           | <b>Oncomine™<br/>Breast cfDNA<br/>Assay</b> |
|-------------------------------------------|--------------------------|--------------------|--------------------------|---------------------------------------------|
| <b>Approx. cost per sample (GBP)</b>      | 3x10                     | 2-3                | 10                       | 200                                         |
| <b>Time (96 reactions)</b>                | 7h                       | 3h x 2             | 2 days                   | 2 days                                      |
| <b>Number of amplicons</b>                | 377                      | 1                  | 48                       | n/a                                         |
| <b>Amplicon size</b>                      | <160bp                   | n/a                | <200bp                   | <170bp                                      |
| <b>Number of genes</b>                    | 20                       | 1 (hotspot)        | 6                        | 10                                          |
| <b>Choice of targets</b>                  | Flexible                 | Limited            | Flexible                 | Limited                                     |
| <b>Median depth</b>                       | 3064                     | 770                | 650 (avg)                | n/a                                         |
| <b>Limit of detection</b>                 | 1-2%                     | >0.1%              | 1-2%                     | 0.6-0.1%                                    |
| <b>Library material as input</b>          | Yes                      | Not tested         | Not tested               | Not tested                                  |
| <b>Ideal input</b>                        | 3x10ng                   | 2-5ng              | 50ng                     | 20ng                                        |
| <b>Multiplex</b>                          | 8plex                    | No                 | No                       | n/a                                         |
| <b>Number of samples per sequence run</b> | 384                      | n/a                | 96                       | 12                                          |
| <b>Platform</b>                           | Fluidigm<br>Access Array | Fluidigm<br>qdPCR  | Fluidigm<br>Access Array | Ion Chef<br>System                          |
| <b>Sequencing</b>                         | Illumina HiSeq<br>4000   | n/a                | Illumina GAIIx           | Ion S5/S5XL™                                |

4

1 **Figure Legends**

2 **Figure 1. NG-TAS workflow and alignment pipeline**

3 (A) NG-TAS workflow. Primers were designed and multiplexed for direct amplification  
4 in cfDNA obtained from plasma using Fluidigm Access Array™. The PCR products  
5 were harvested and barcoded in a subsequent PCR reaction, the samples were pooled  
6 and size selected for sequencing on an Illumina Hi-Seq 4000. (B) Schematic  
7 representation of the computational pipeline for reads alignment, filtering and  
8 annotation.

9

10 **Figure 2. Optimising targeted deep sequencing by NG-TAS**

11 (A) Percentage of aligned reads were compared in different samples where a variable  
12 amount of input control genomic DNA was used (range 50 to 0.016ng). The effect of  
13 pre-amplification and Q solutions are shown, red = No Q solution and no pre-  
14 amplification step, green = With Q solution and no pre-amplification, blue = No Q  
15 solution and with pre-amplification. (B) Density plot showing the log<sub>10</sub> coverage values  
16 for all primers in the 10 ng NA12878 cfDNA sample. The dotted line indicates 100x  
17 coverage; median value for the distribution is 3064x. (C) Coverage heatmap of  
18 individual primers for different amount of input NA12878 cfDNA. For each amount of  
19 input DNA the analysis was performed in triplicate. (D) Distribution of all non-reference  
20 base frequencies across all target regions in the NA12878 dilution series in (C).

21

22 **Figure 3. Detection of SNVs in NA12878 cfDNA dilution series**

23 (A) Expected versus observed VAF for 4 SNVs in the NA12878-NA11840 dilution  
24 series starting from 50 ng input DNA (left) and zoom-in for expected VAF <5% (right).  
25 (B) Expected versus observed VAF for 4 SNVs in the NA12878-NA11840 dilution  
26 series starting from 10 ng input DNA (left) and zoom-in for expected VAF <5% (right).  
27 (C) Expected versus observed VAF for 4 SNVs in the NA12878-NA11840 dilution  
28 series starting from 5 ng input DNA (left) and zoom-in for expected VAF <5% (right).  
29 (D) Expected versus observed VAF for 4 SNVs in the NA12878-NA11840 dilution  
30 series starting from post-NGS library input DNA (left) and zoom-in for expected VAF  
31 <5% (right).

32

33 **Figure 4. Mutation calling in NA12878 cfDNA dilution series**

34 (A) Schematic overview of the computational pipeline to identify somatic mutations in  
35 NG-TAS data. (B) *De novo* mutation calling in the NA12878 dilution series was  
36 evaluated for different amounts of input cfDNA. 4 SNVs can potentially be called using

1 our panel of 377 amplicons. (C) VAF for all FP calls in the NA12878 dilution series.  
2 The red dashed line represents 5% VAF.

3

#### 4 **Figure 5. Validation of NG-TAS performance in clinical plasma samples**

5 (A) The specificity of NG-TAS in clinical samples was estimated using 4 pairs of buffy  
6 coats from the same patients (A, B, C and D). The mutation calling pipeline was applied  
7 using one buffy coat as normal and the other as 'tumour' and vice versa. All mutations  
8 called in this setting can be considered FPs. The red line indicates 5% VAF. (B)  
9 Oncoprint summary plot of genes mutated in 24 cases for which both tissue and  
10 plasma samples were tested. The vertical black line separates cases for which the  
11 primary tumour was analysed from cases for which a metastasis biopsy was analysed.  
12 (B-C) Comparison of VAF obtained by NG-TAS and dPCR. (C) In this comparison, four  
13 different hotspot mutations including *AKT1* (*E17K*), *ESR1* (*D538G*), *KRAS* (*G13D*) and  
14 *PIK3CA* (*H1047R*) identified in multiple plasma samples from 4 distinct patients were  
15 analysed ( $R^2 = 0.64$ ). (D) Two *PIK3CA* hotspots (*H1047R* and *E545K*) were detected  
16 by NG-TAS using NGS library as input material in plasma samples from two distinct  
17 patients. The same mutations were detected using dPCR and a good correlation was  
18 found ( $R^2 = 0.80$ ).

19

#### 20 **Figure 6. Monitoring response in metastatic breast cancer patients using NG-** 21 **TAS**

22 (A) Example of patient monitoring during treatment using direct NG-TAS in ctDNA.  
23 There are four mutations detected in more than one sample: *GATA3* (*F431fs*), *PIK3CA*  
24 (*E542K*), *CDKN1B* (*N124fs*) and *PTEN* (*137-139del*). The mutations called more than  
25 once in the longitudinal samples are shown including tumour and plasma samples.  
26 The arrow indicates the time of the disease considered as RECIST progressive  
27 disease. T indicates tumour samples, and SP indicates screening plasma sample  
28 which was collected prior to the treatment. (B) Example of patient monitoring during  
29 treatment using NGS library material for NG-TAS. This patient had a stable disease  
30 during the whole treatment period. There are three mutations detected, including  
31 *MAP3K1* (*E303 frame shift*), hotspot mutations *PIK3CA* (*E545K*) and *TP53* (*R141H*  
32 and *P46fs*). T indicates tumour samples.

33

34

1 **Supplementary Figures**

2 **Figure S1** - Representative image of the Bioanalyser gel plot. The 8plex PCR products  
3 were analysed using Bioanalyser for primer efficiency and quality control.

4

5 **Figure S2** - Fragment size distribution according to the Bioanalyser results for cfDNA  
6 extracted from the media where NA12878 cells were grown (main peak at around 160-  
7 170bp).

8

9 **Figure S3** – (A) Percentage of amplicons having more than 100x coverage for 2, 5  
10 and 10 ng of input cfDNA from NA12878 sample. (B) Percentage of reads on target for  
11 2, 5 and 10 ng of input cfDNA from NA12878 sample.

12

13 **Figure S4** – Schematic overview of the computational pipeline to identify somatic  
14 mutations in NG-TAS data from longitudinal samples.

15

16 **Figure S5** – Detailed representation of mutations identified in tumour or plasma  
17 samples of 21 metastatic breast cancer cases. The colour gradient indicates the VAF  
18 as indicated; PT = primary tumour, M = metastasis biopsy, V1...n = plasma.



## 1 REFERENCES

- 2
- 3 [1] Leon SA, Shapiro B, Sklaroff DM, Leon SA, Shapiro B, Sklaroff DM, et al. Free  
4 DNA in the Serum of Cancer Patients and the Effect of Therapy Free DNA in  
5 the Serum of Cancer Patients and the Effect of Therapy. *Cancer Res*  
6 1977;37:646–50.
- 7 [2] Vasioukhin V, Anker P, Maurice P, Lyautey J, Lederrey C, Stroun M. Point  
8 mutations of the N-ras gene in the blood plasma DNA of patients with  
9 myelodysplastic syndrome or acute myelogenous leukaemia. *Br J Haematol*  
10 1994;86:774–9. doi:10.1111/j.1365-2141.1994.tb04828.x.
- 11 [3] Sorenson GD, Pribish DM, Valone FH, Memoli V a, Bzik DJ, Yao SL. Soluble  
12 Normal and Mutated Dna-Sequences From Single-Copy Genes in Human  
13 Blood. *Cancer Epidemiol Biomarkers Prev* 1994;3:67–71.
- 14 [4] Murtaza M, Dawson S-J, Tsui DWY, Gale D, Forshew T, Piskorz AM, et al.  
15 Non-invasive analysis of acquired resistance to cancer therapy by sequencing  
16 of plasma DNA. *Nature* 2013;497:108–12. doi:10.1038/nature12065.
- 17 [5] Diehl F, Schmidt K, Choti M a, Romans K, Goodman S, Li M, et al. Circulating  
18 mutant DNA to assess tumor dynamics. *Nat Med* 2008;14:985–90.  
19 doi:10.1038/nm.1789.
- 20 [6] Schwarzenbach H, Hoon DS. B, Pantel K. Cell-free nucleic acids as  
21 biomarkers in cancer patients. *Nat Rev Cancer* 2011;11:426–37.  
22 doi:10.1038/nrc3066.
- 23 [7] Dawson S-J, Tsui DWY, Murtaza M, Biggs H, Rueda OM, Chin S-F, et al.  
24 Analysis of circulating tumor DNA to monitor metastatic breast cancer. *N Engl*  
25 *J Med* 2013;368:1199–209.
- 26 [8] Wan JCM, Massie C, Garcia-corbacho J, James D, Caldas C, Pacey S, et al.  
27 Liquid biopsies come of age: clinical applications of circulating tumour DNA.  
28 *Nat Rev Cancer* 2016. doi:10.1038/nrc.2017.7.
- 29 [9] Vogelstein B, Kinzler KW. Digital PCR. *Proc Natl Acad Sci U S A*  
30 1999;96:9236–41. doi:10.1073/pnas.96.16.9236.
- 31 [10] Dressman D, Yan H, Traverso G, Kinzler KW, Vogelstein B. Transforming  
32 single DNA molecules into fluorescent magnetic particles for detection and  
33 enumeration of genetic variations. *Proc Natl Acad Sci U S A* 2003;100:8817–  
34 22. doi:10.1073/pnas.1133470100.
- 35 [11] Hughesman CB, Lu XJD, Liu KYP, Zhu Y, Poh CF, Haynes C. Robust protocol  
36 for using multiplexed droplet digital PCR to quantify somatic copy number  
37 alterations in clinical tissue specimens. *PLoS One* 2016;11:1–22.  
38 doi:10.1371/journal.pone.0161274.
- 39 [12] Forshew T, Murtaza M, Parkinson C, Gale D, Tsui DWY, Kaper F, et al.  
40 Noninvasive Identification and Monitoring of Cancer Mutations by Targeted  
41 Deep Sequencing of Plasma DNA. *Sci Transl Med* 2012;4:136ra68-136ra68.  
42 doi:10.1126/scitranslmed.3003726.
- 43 [13] Torga G, Pienta KJ. Patient-Paired Sample Congruence Between 2  
44 Commercial Liquid Biopsy Tests. *JAMA Oncol* 2017.  
45 doi:10.1001/jamaoncol.2017.4027.
- 46 [14] Kinde I, Wu J, Papadopoulos N, Kinzler KW, Vogelstein B. Detection and  
47 quantification of rare mutations with massively parallel sequencing. *Proc Natl*  
48 *Acad Sci* 2011;108:9530–5. doi:10.1073/pnas.1105422108.
- 49 [15] Callari M, Sammut S, Mattos-arruda L De, Bruna A, Rueda OM, Chin S-F, et  
50 al. Intersect-then-combine approach : improving the performance of somatic  
51 variant calling in whole exome sequencing data using multiple aligners and  
52 callers 2017:1–11. doi:10.1186/s13073-017-0425-1.
- 53 [16] Cerami E, Gao J, Dogrusoz U, Gross BE, Sumer SO, Arman B, et al. In Focus  
54 The cBio Cancer Genomics Portal : An Open Platform for Exploring  
55 Multidimensional Cancer Genomics Data 2012. doi:10.1158/2159-8290.CD-

- 1 12-0095.  
2 [17] Gao J, Aksoy BA, Dogrusoz U, Dresdner G, Gross B, Sumer SO, et al.  
3 Integrative Analysis of Complex Cancer Genomics and Clinical Profiles Using  
4 the cBioPortal Complementary Data Sources and Analysis Options 2013;6:1–  
5 20.  
6 [18] Sims D, Sudbery I, Illott NE, Heger A, Ponting CP. Sequencing depth and  
7 coverage: key considerations in genomic analyses. *Nat Rev Genet*  
8 2014;15:121–32. doi:10.1038/nrg3642.  
9 [19] Kou R, Lam H, Duan H, Ye L, Jongkam N, Chen W. Benefits and Challenges  
10 with Applying Unique Molecular Identifiers in Next Generation Sequencing to  
11 Detect Low Frequency Mutations 2016:1–15.  
12 doi:10.5061/dryad.n6068.Funding.  
13 [20] Eberle MA, Fritzilas E, Krusche P, Källberg M, Moore BL, Bekritsky MA. A  
14 reference dataset of 5.4 million human variants validated by genetic  
15 inheritance from sequencing a three-generation 17-member pedigree.  
16 *Genome Res* 2017;27. doi:10.1101/gr.210500.116.  
17 [21] Yung TKF, Chan KCA, Mok TSK, Tong J, To K-F, Lo YMD. Single-molecule  
18 detection of epidermal growth factor receptor mutations in plasma by  
19 microfluidics digital PCR in non-small cell lung cancer patients. *Clin Cancer*  
20 *Res* 2009;15:2076–84. doi:10.1158/1078-0432.CCR-08-2622.  
21 [22] Schiavon G, Hrebien S, Garcia-Murillas I, Cutts RJ, Pearson a., Tarazona N,  
22 et al. Analysis of ESR1 mutation in circulating tumor DNA demonstrates  
23 evolution during therapy for metastatic breast cancer. *Sci Transl Med*  
24 2015;7:313ra182-313ra182.  
25

**Figure 1**

**A**

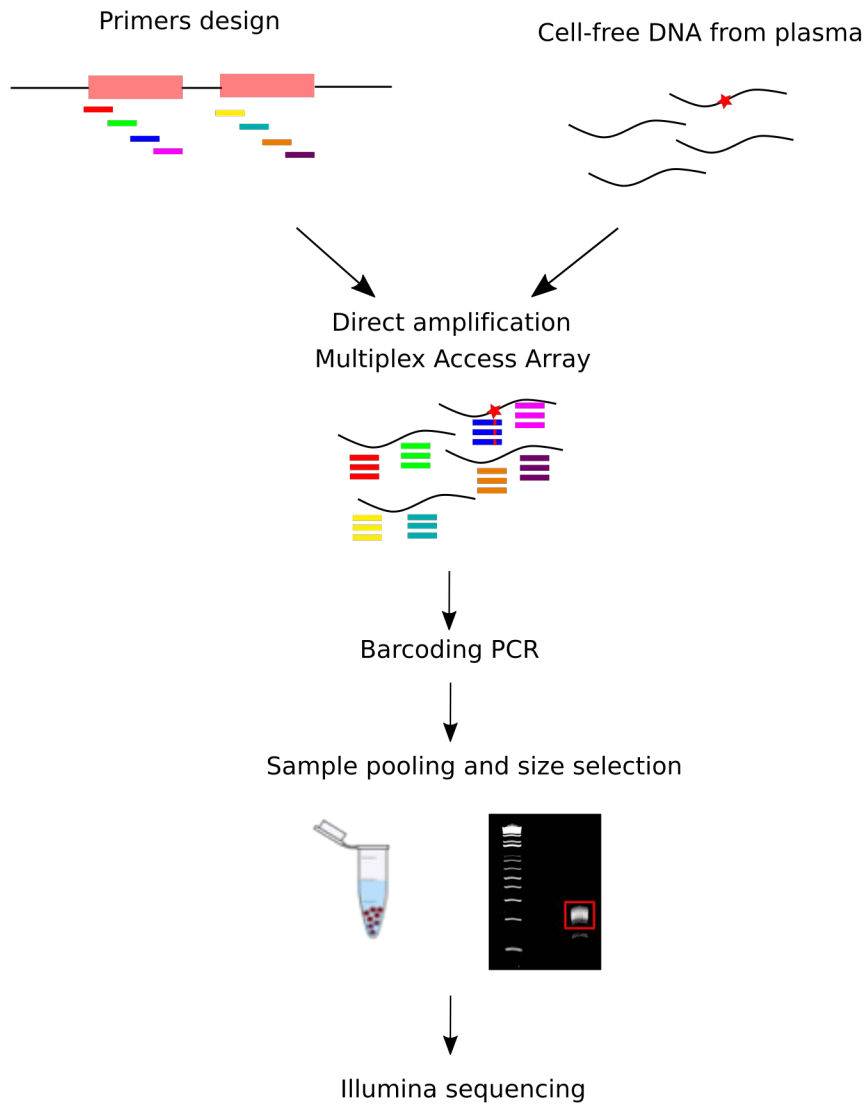

**B**

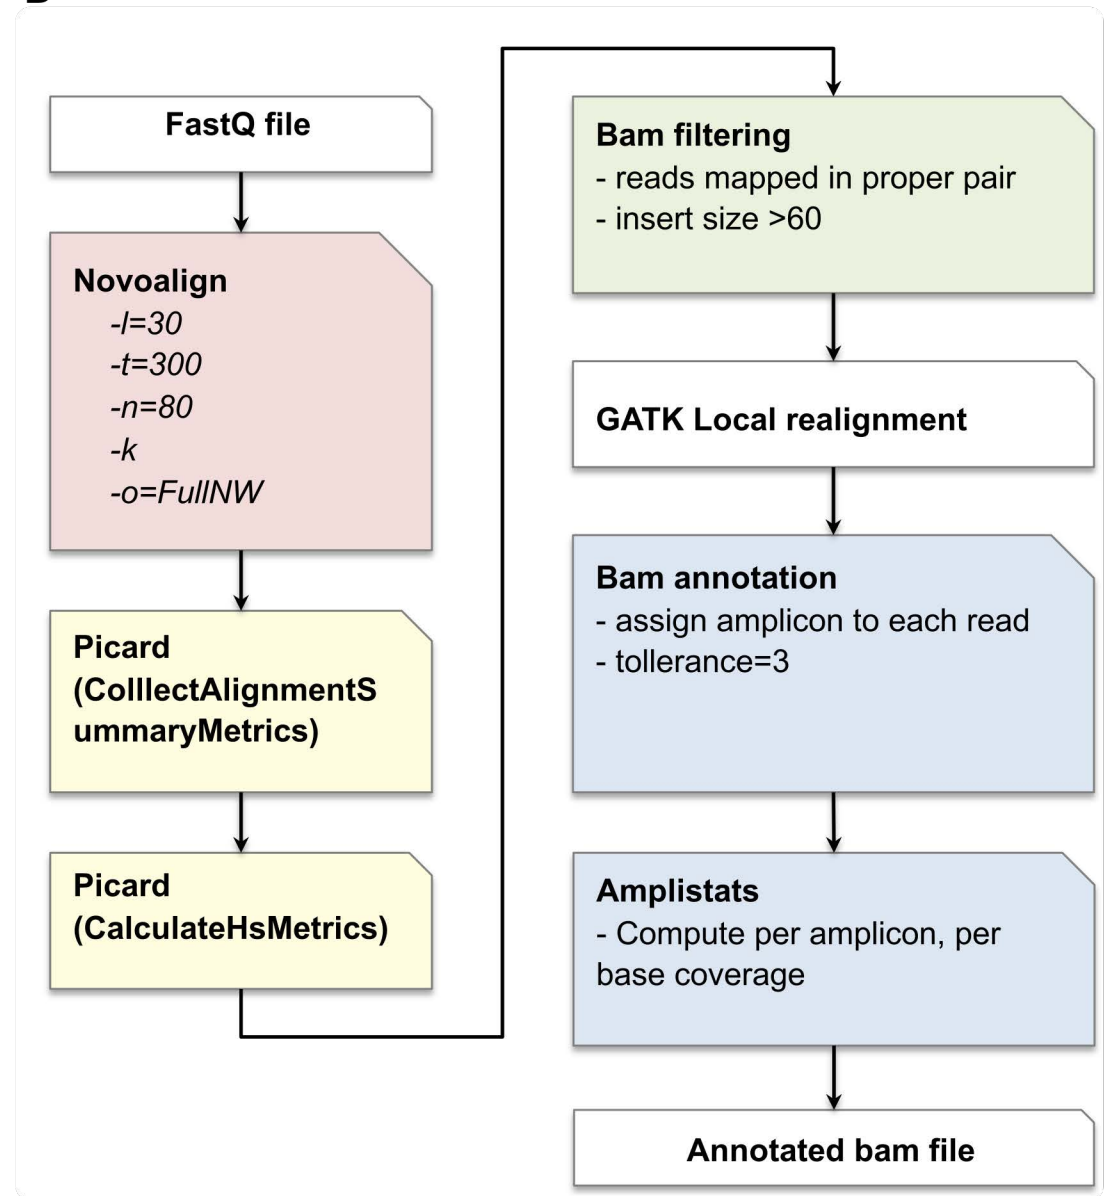

## Figure 2

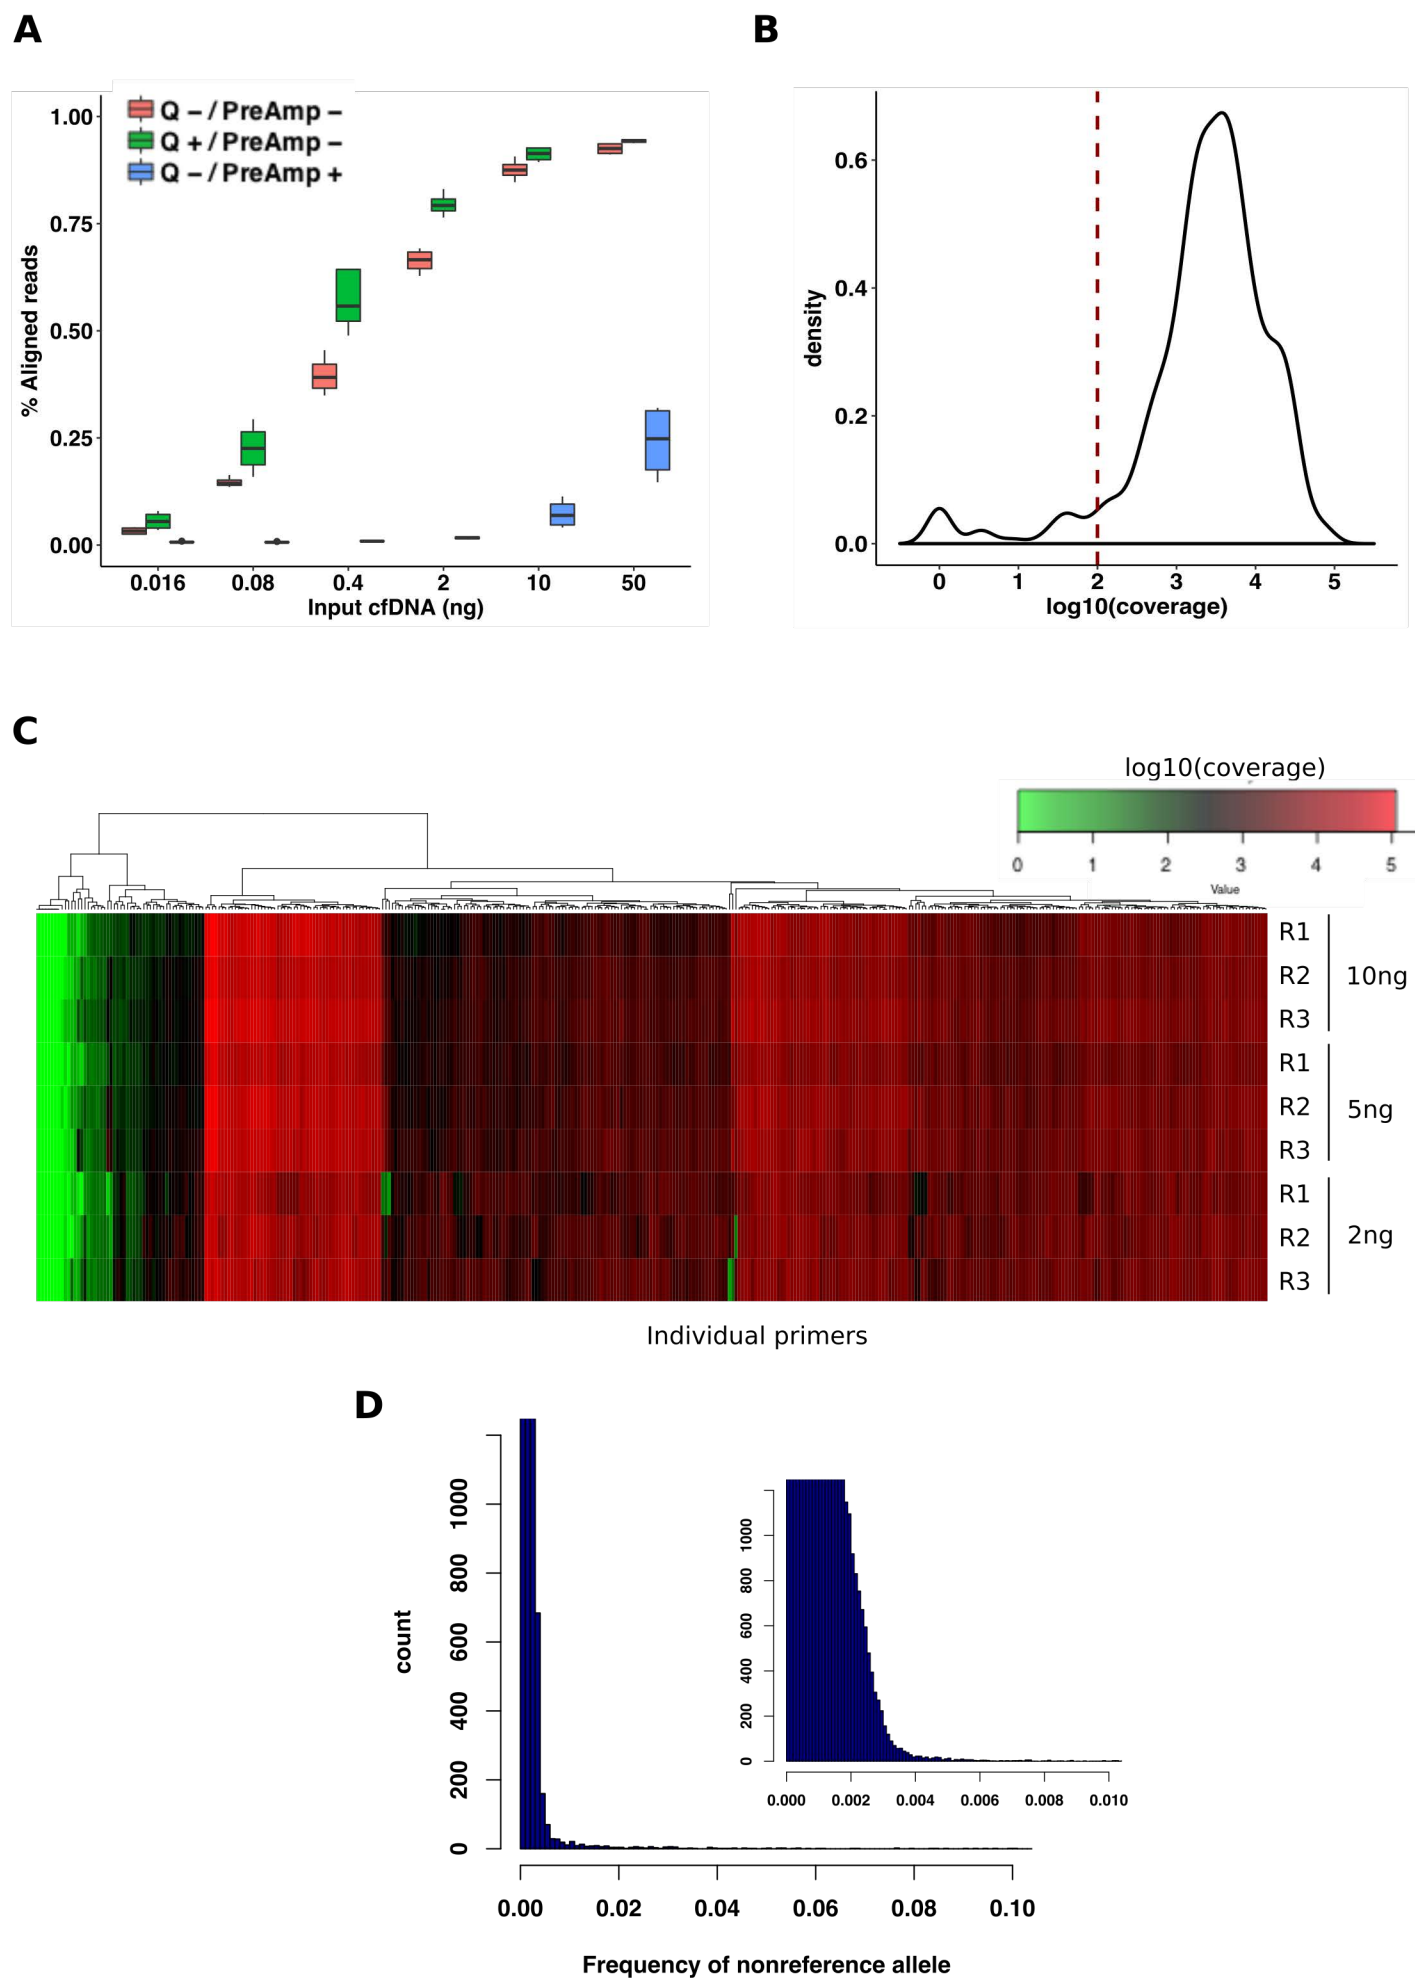

# Figure 3

## A

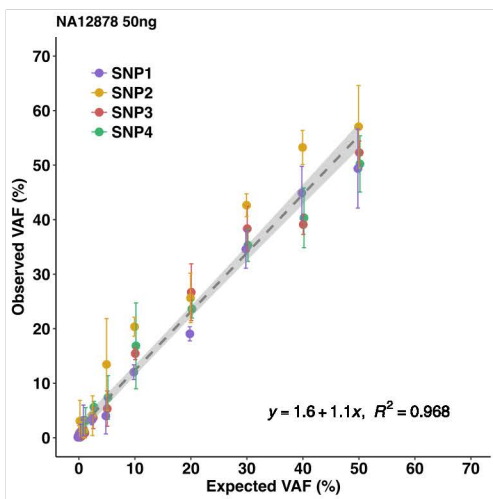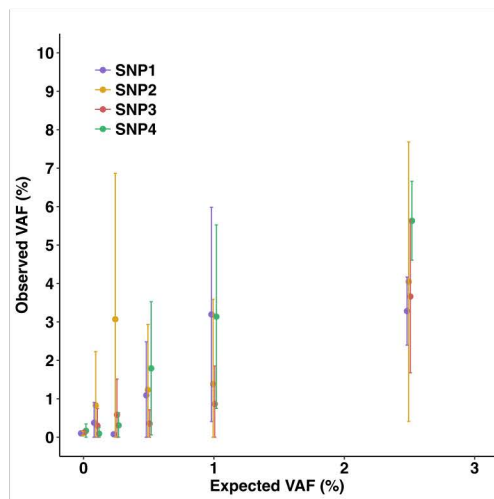

## B

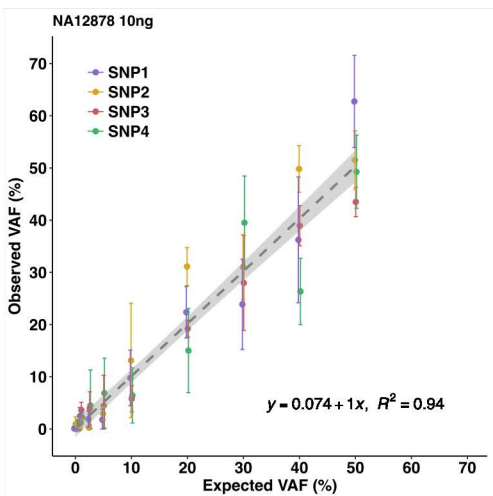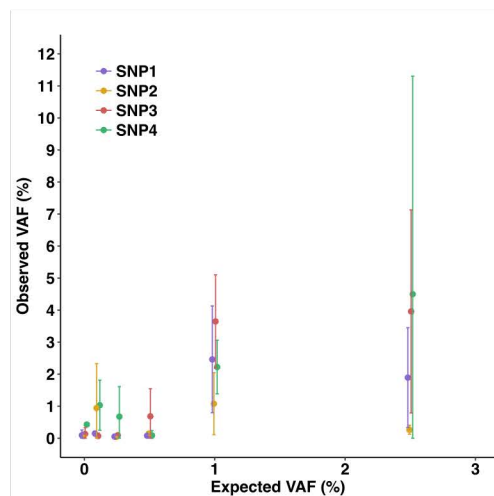

## C

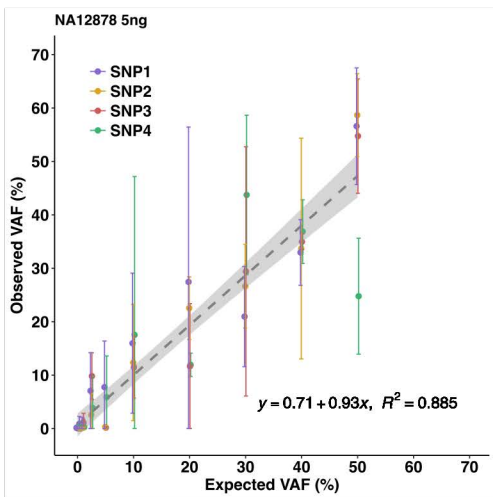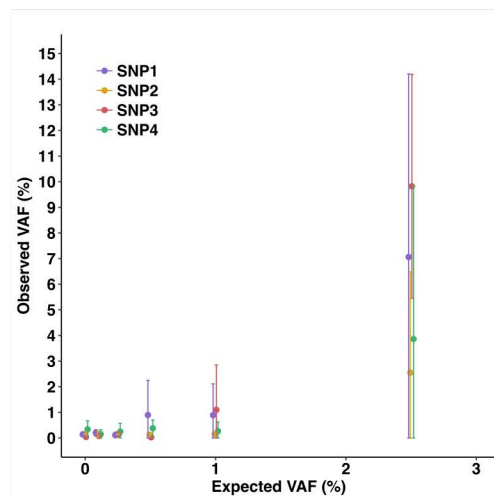

## D

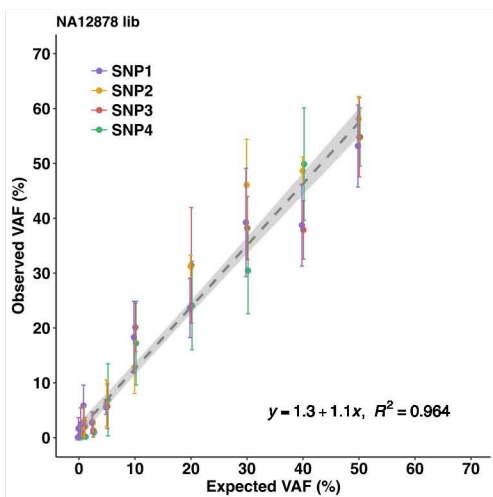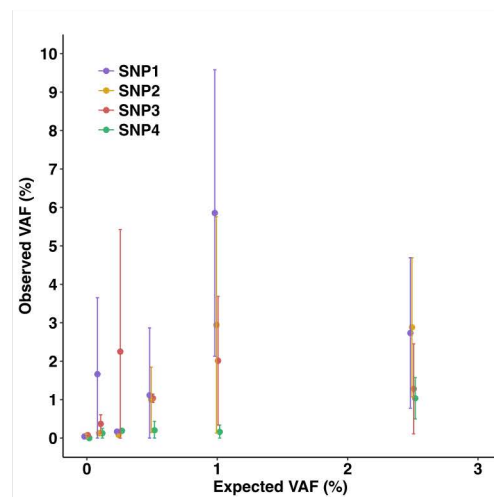

**Figure 4**

not certified by peer review) is the author/funder. All rights reserved. No reuse allowed without permission.

**A**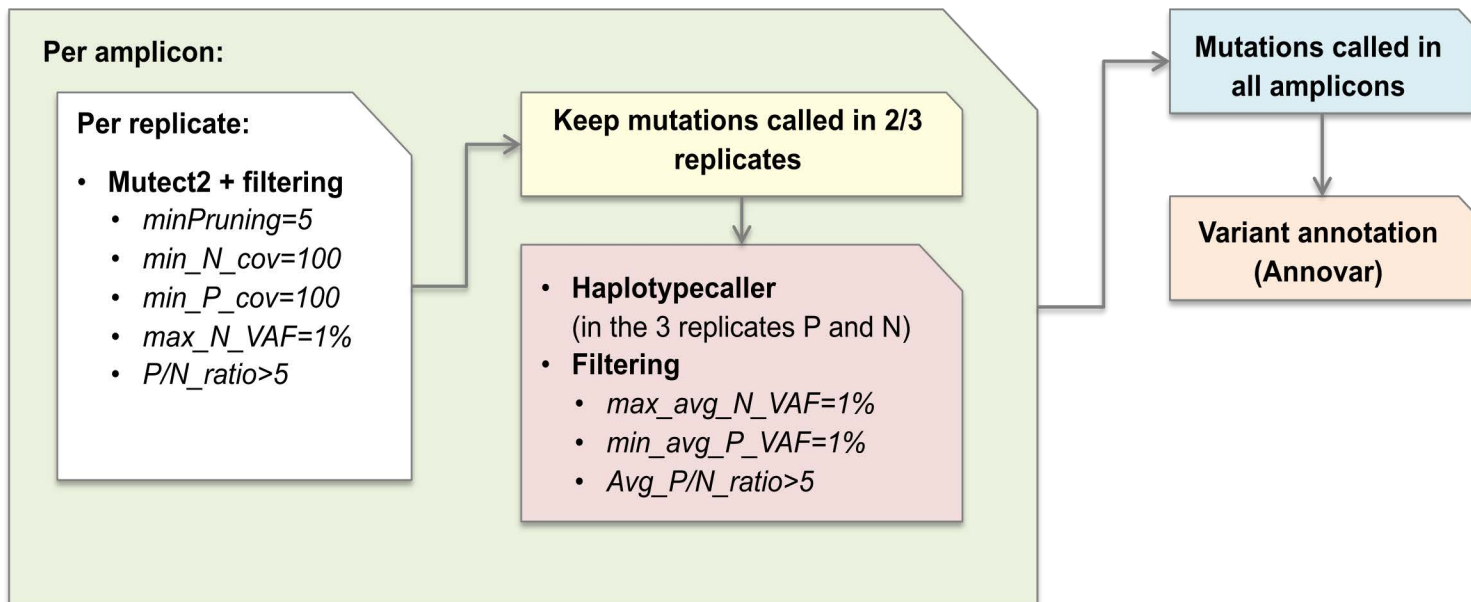**B**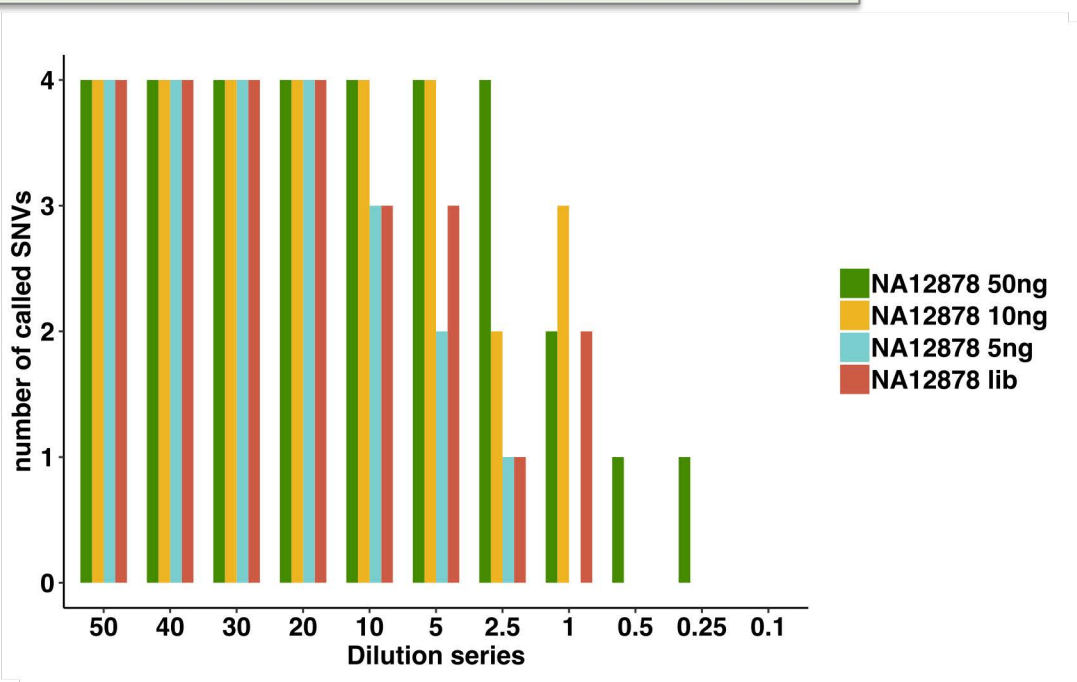**C**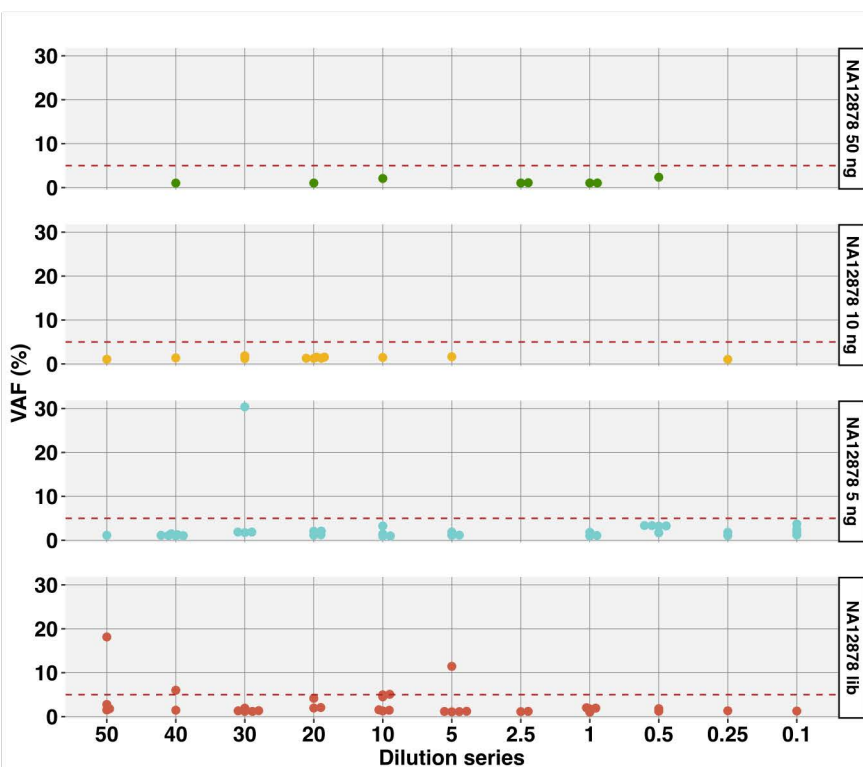

**Figure 5**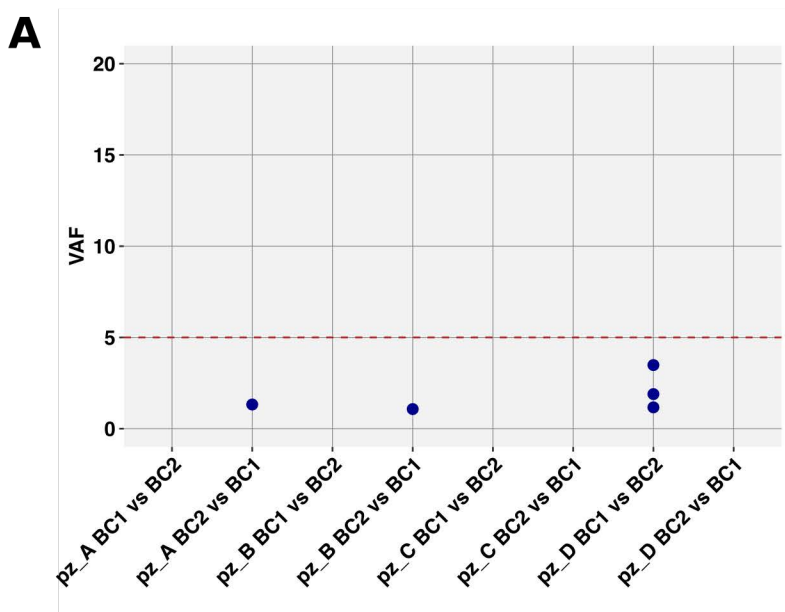**B**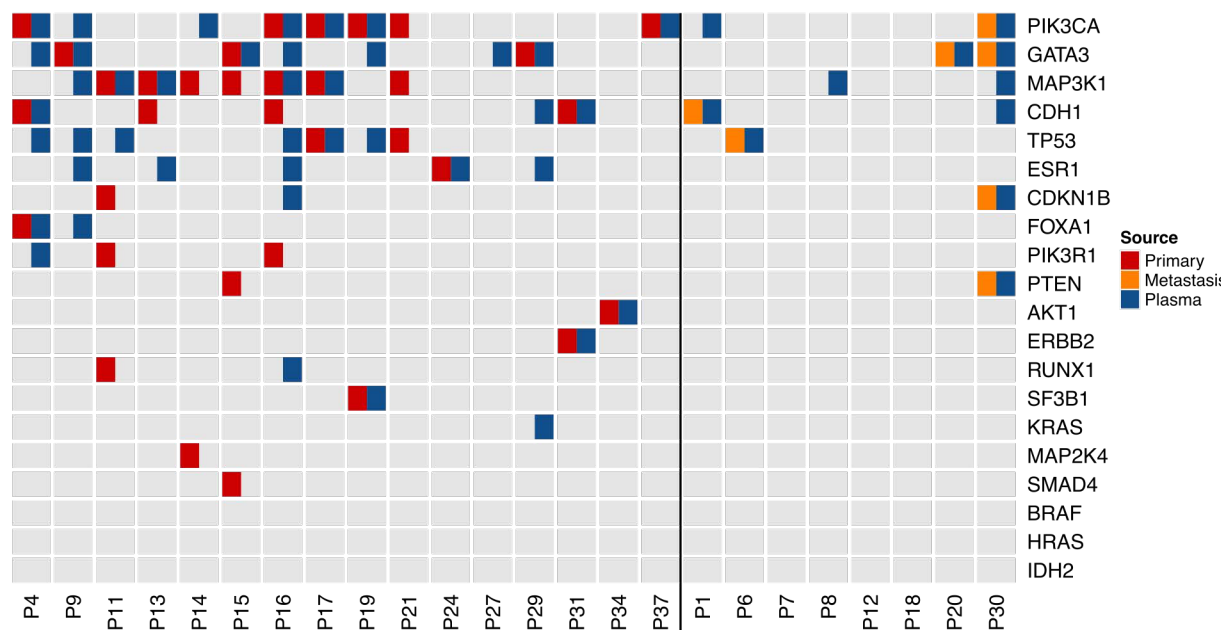**C****Direct NGTAS**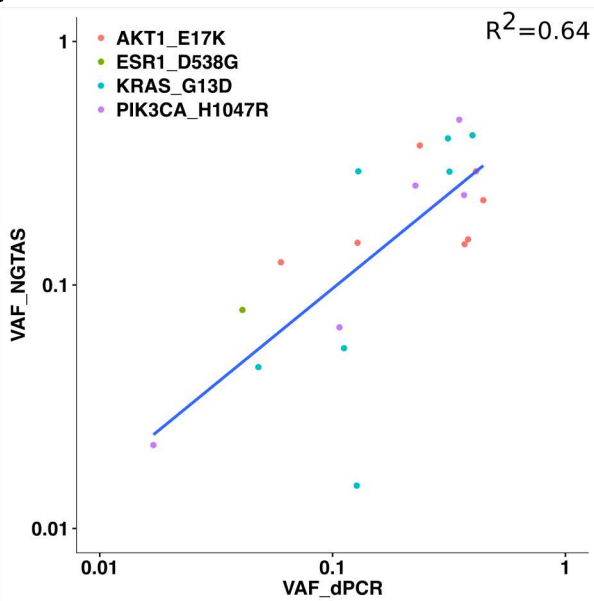**D****Library - NGTAS**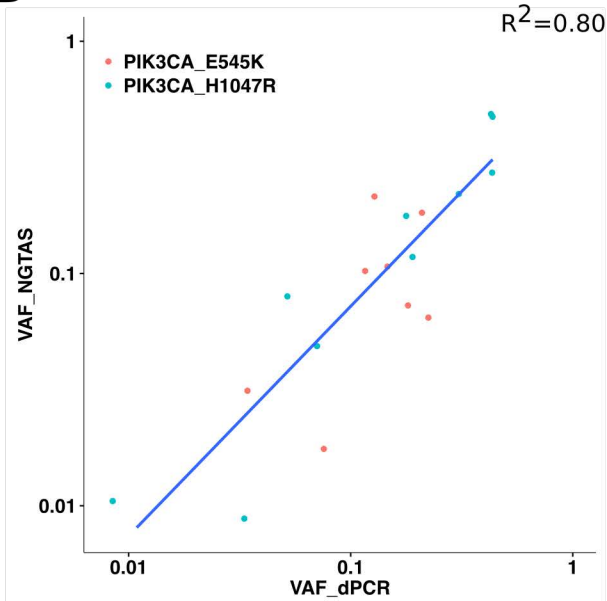

**Figure 6****A**

Direct NGTAS

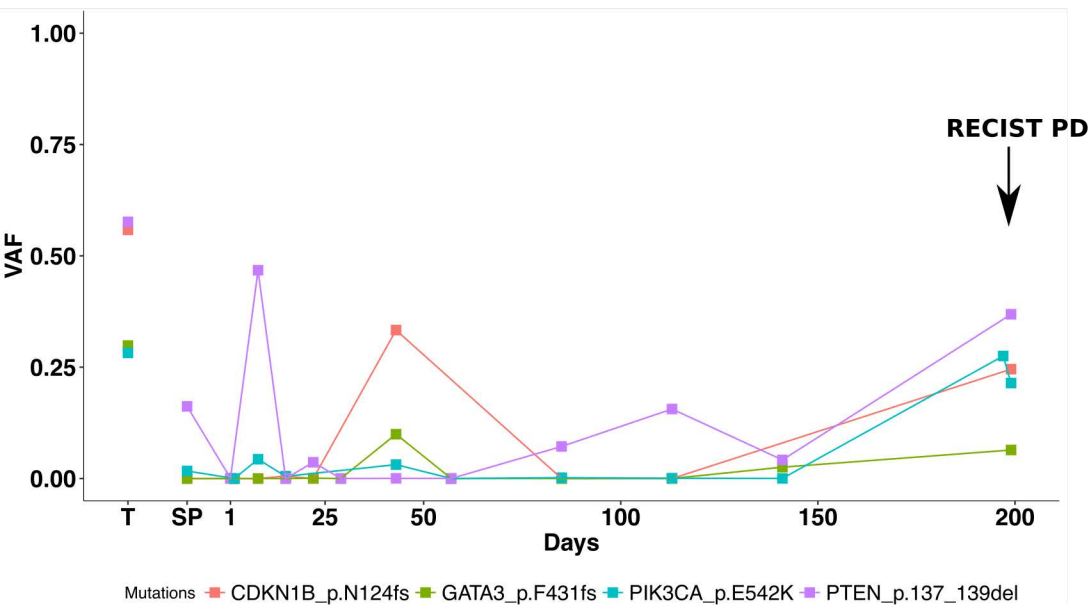**B**

Library - NGTAS

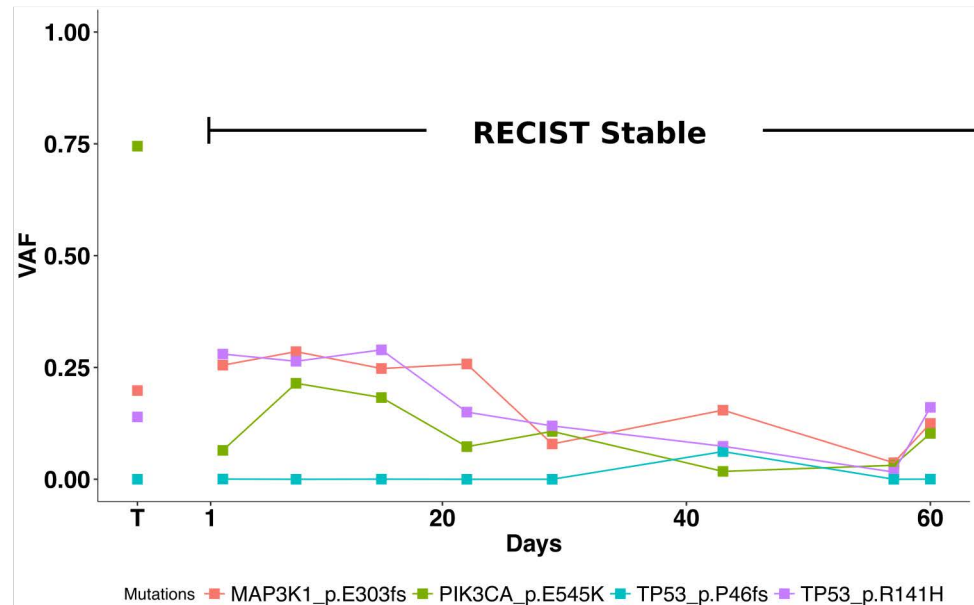

Source: https://www.biorxiv.org/content/10.1101/366534v1.full.pdf
